# Supplementary material
Source: PubMed Central journal article supplement (PMC7024675)
Supplement: NIHMS1546972-supplement-1.pdf [file NIHMS1546972-supplement-1.pdf]

**Supplementary Materials:**

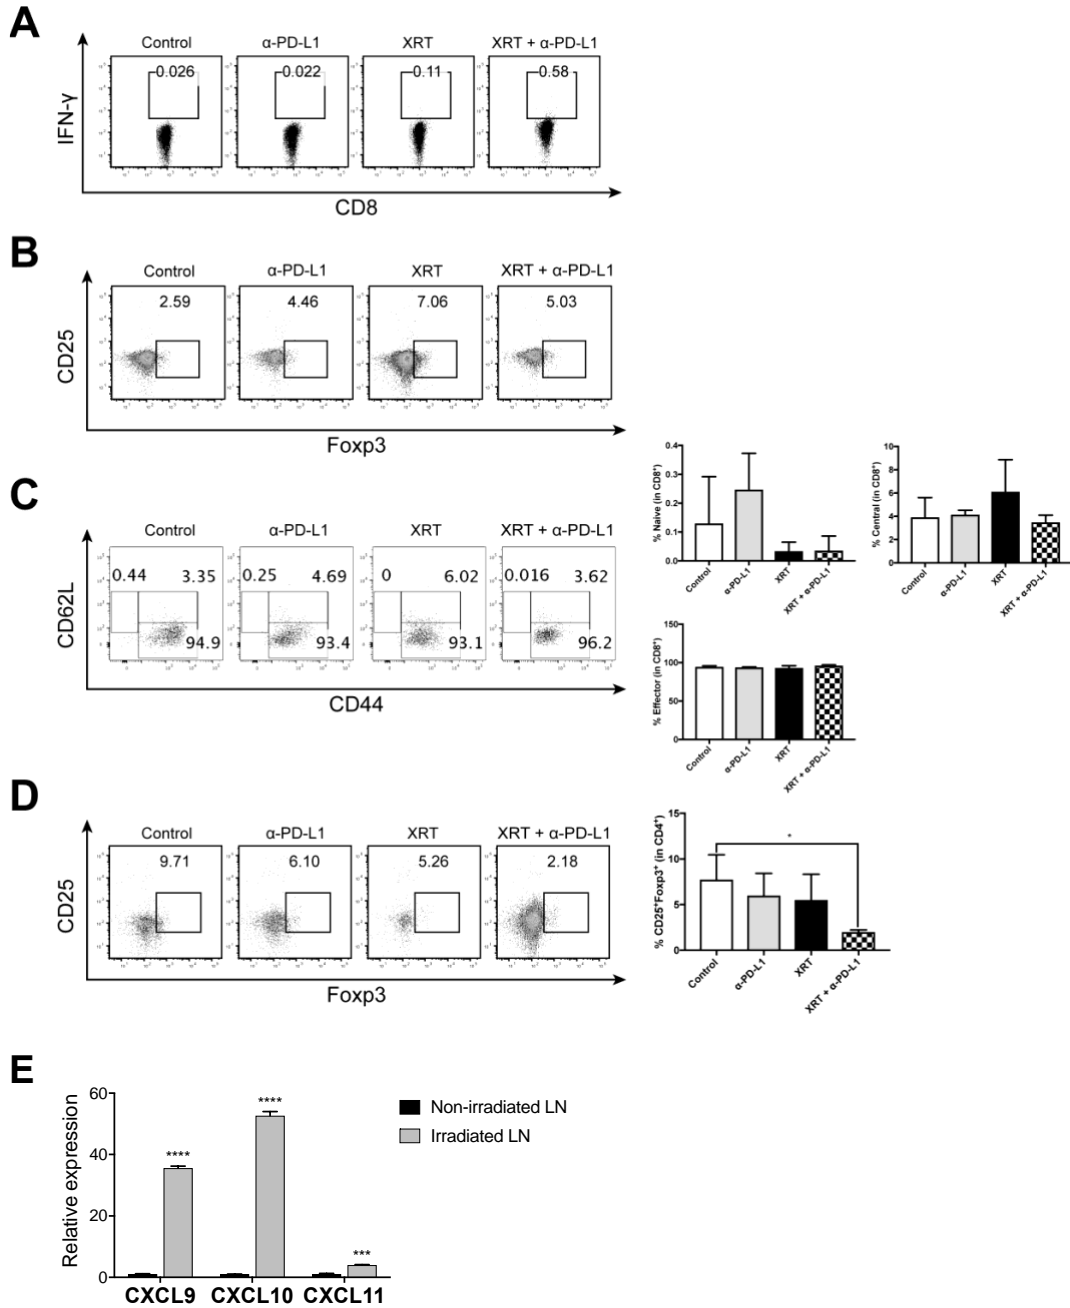

**Supplementary Figure 1:** Radiation combined with anti-PD-L1 immunotherapy activates CD8<sup>+</sup> T cells, but decreases regulatory T cell population in a head and neck cancer model. **A)** Representative dot plots of IFN- $\gamma$ <sup>+</sup> cells in CD8<sup>+</sup> T cells in the TDLN from an AT-84-E7 orthotopic model. **B)** Representative dot plots of CD25<sup>+</sup>Foxp3<sup>+</sup> regulatory T cells within CD4<sup>+</sup> T cells from the TDLN in an AT-84-E7 flank model. **C)** Memory subsets of CD8<sup>+</sup> T cells in TIL from AT-84-E7-bearing mice. **D)** Percentage of CD25<sup>+</sup>Foxp3<sup>+</sup> regulatory T cells within CD4<sup>+</sup> T cells from TIL in an AT-84-E7 flank model. **E)** mRNA expression of chemokines in irradiated- and nonirradiated- LN from HNSCC patient was analyzed by RT-qPCR. Data are shown as mean  $\pm$  S.E.M. Abbreviations: TDLN, tumor-draining lymph node; TIL, tumor-infiltrating lymphocyte

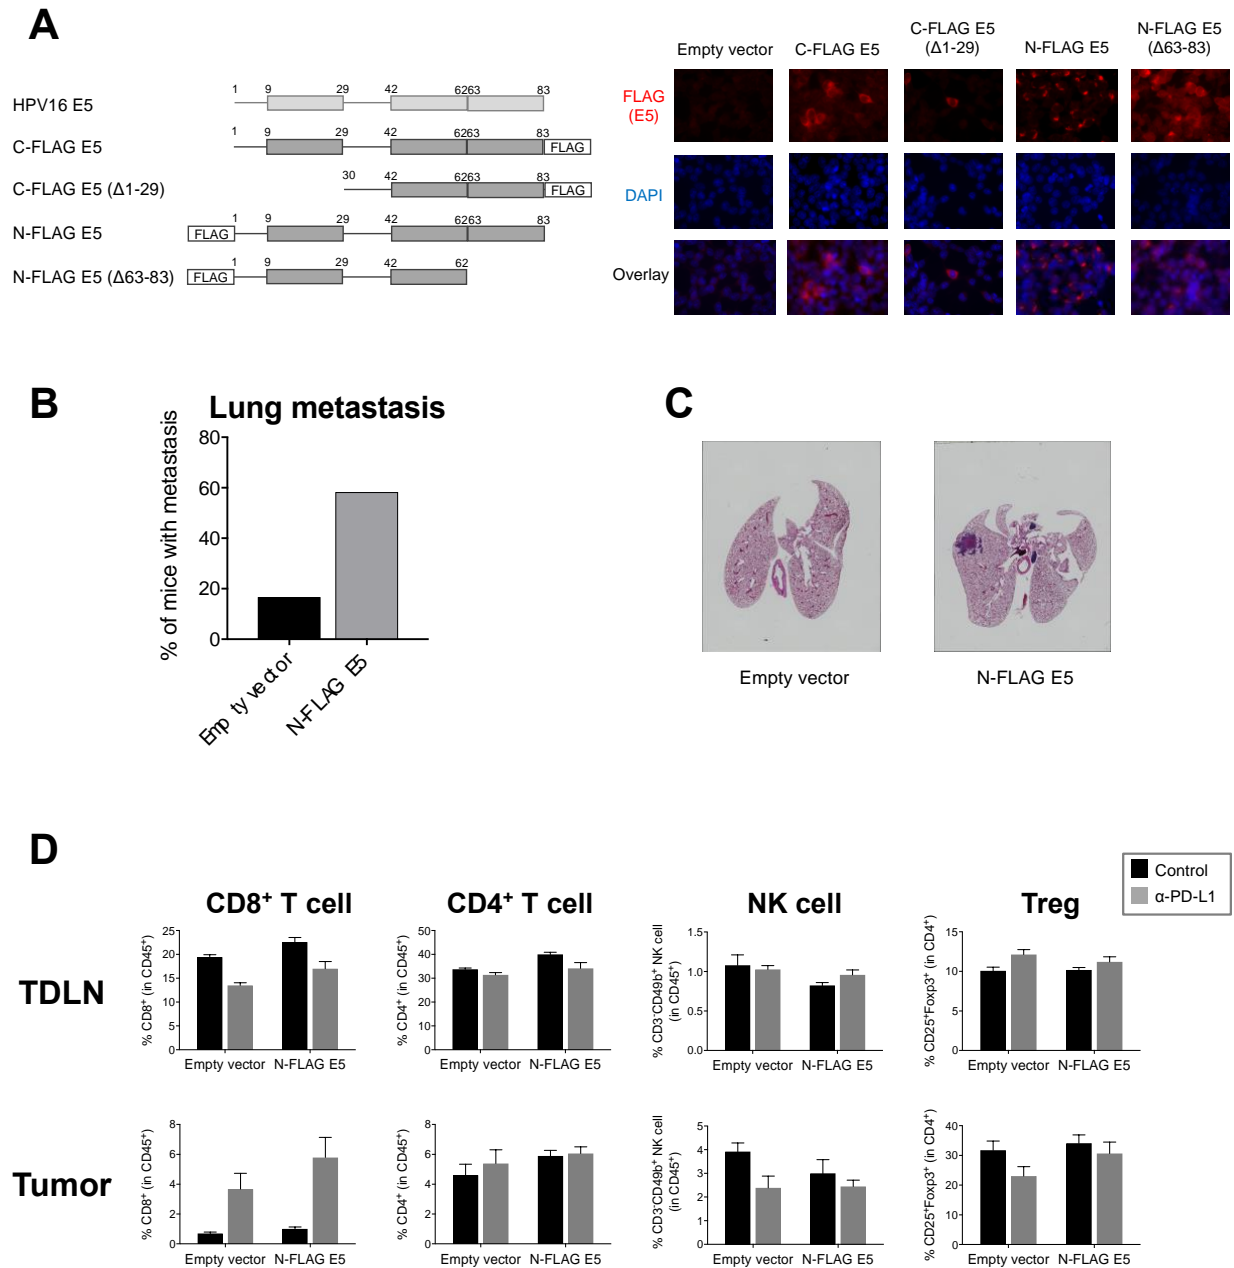

**Supplementary figure 2: N-FLAG E5 localized in Golgi apparatus and promoted lung metastasis. A)** (left) HPV16 E5 construct schemes. (right) Immunofluorescence of E5 (red) and nuclei (blue) in transiently transfected HEK293T. **B)** Percentage of the mice with lung metastasis among AT-84-E7-bearing mice on Day 28 after tumor inoculation. **C)** Representative images of lung metastasis stained with H&E. **D)** Flow cytometric analysis of various immune cell population in TDLN and tumor. Data are shown as mean  $\pm$  S.E.M. Statistics were done using an unpaired *t*-test.

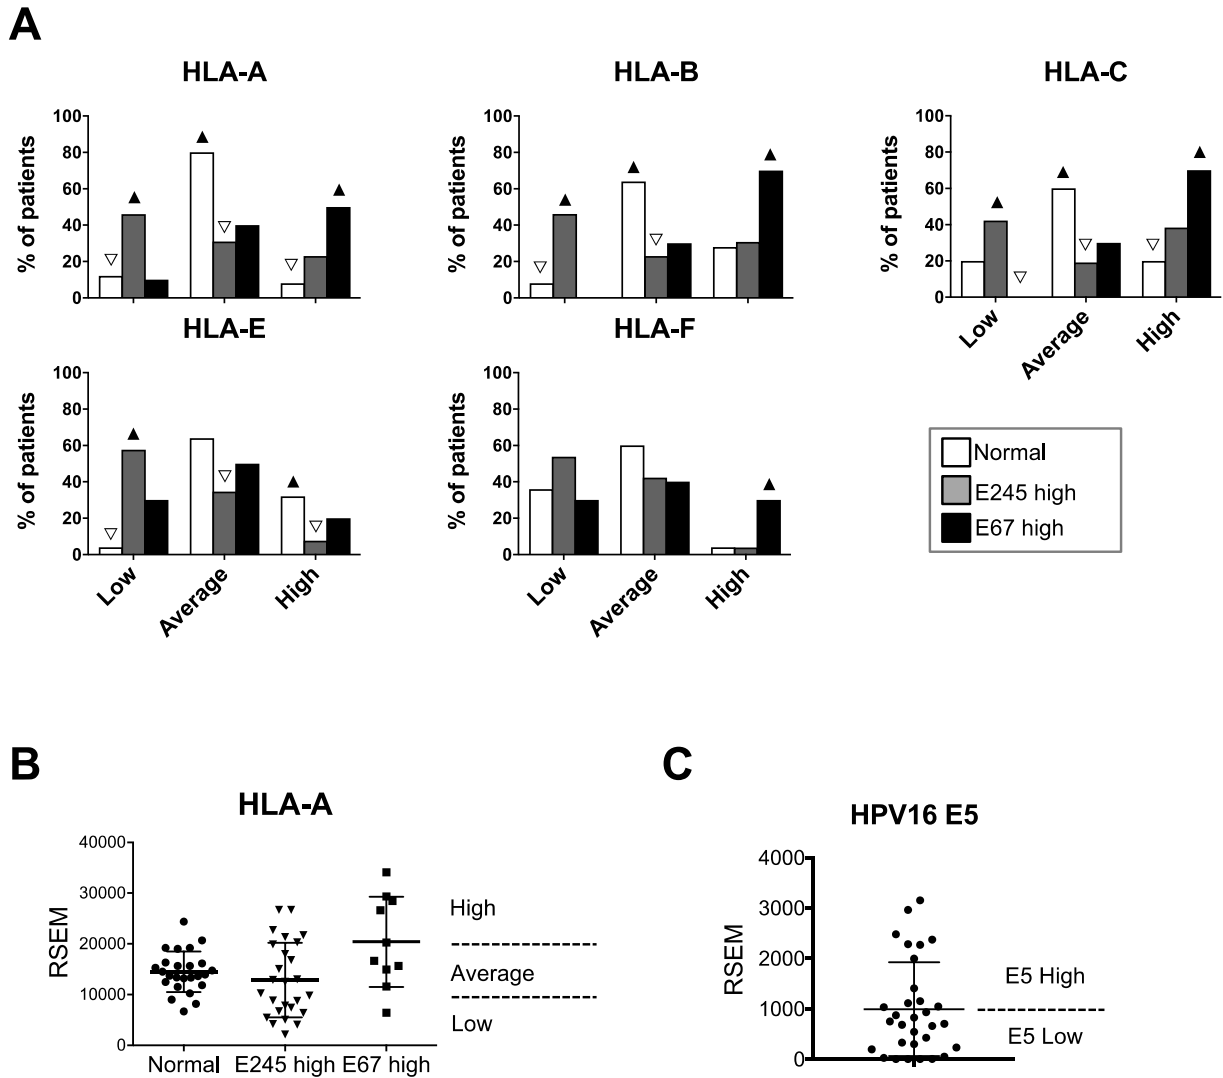

**Supplementary figure 3:** Patients with high expression of HPV16 E5 have low HLA expression **A, B**) mRNA expression of different types of HLAs. Patients were assigned to 3 groups (high, average, and low) based on each HLA expression. Graph **B**) shows HLA-A as an example. Chi-square test ( $X^2$  and  $p$ -value) and residual analysis ( $\blacktriangle$ : significantly high,  $\nabla$ : significantly low,  $P < 0.05$ ). **C**) mRNA expression of HPV16 E5. Patients were divided into 2 groups (high- and low- expression) based on expression relative to the median.

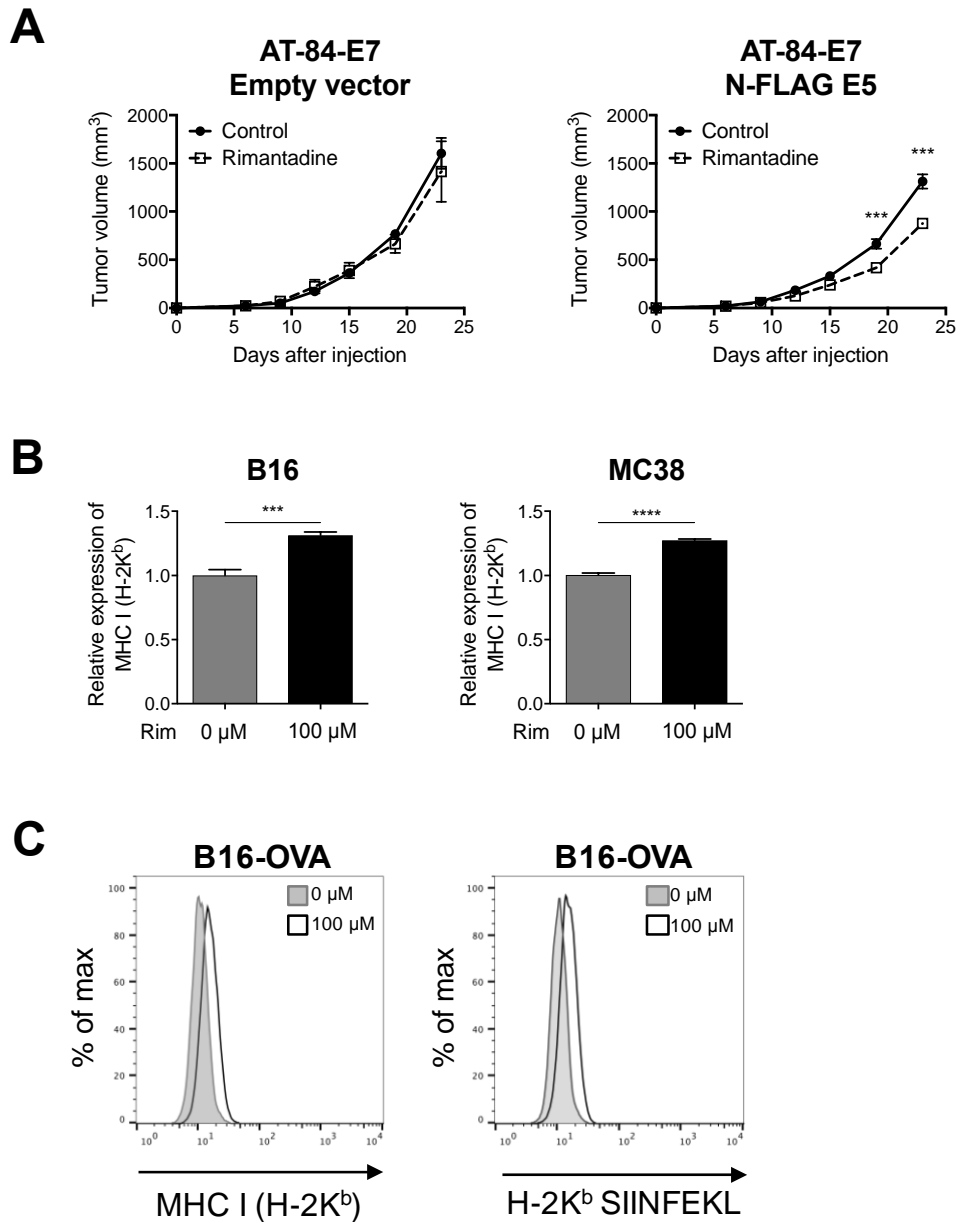

**Supplementary figure 4:** Rimantadine enhances MHC expression and antigen-presentation on tumor cells. **A)**  $5 \times 10^5$  AT-84-E7 cells expressing empty vector or FLAG-tagged E5 were subcutaneously injected and treated with rimantadine for one week.  $n = 6$  in each group. **B)** MHC I expression was analyzed by flow cytometry 48 hours after rimantadine treatment. **C)** Expression of MHC I and antigen presentation (H-2K<sup>b</sup>/SIINFEKL) 24 hours after rimantadine treatment.

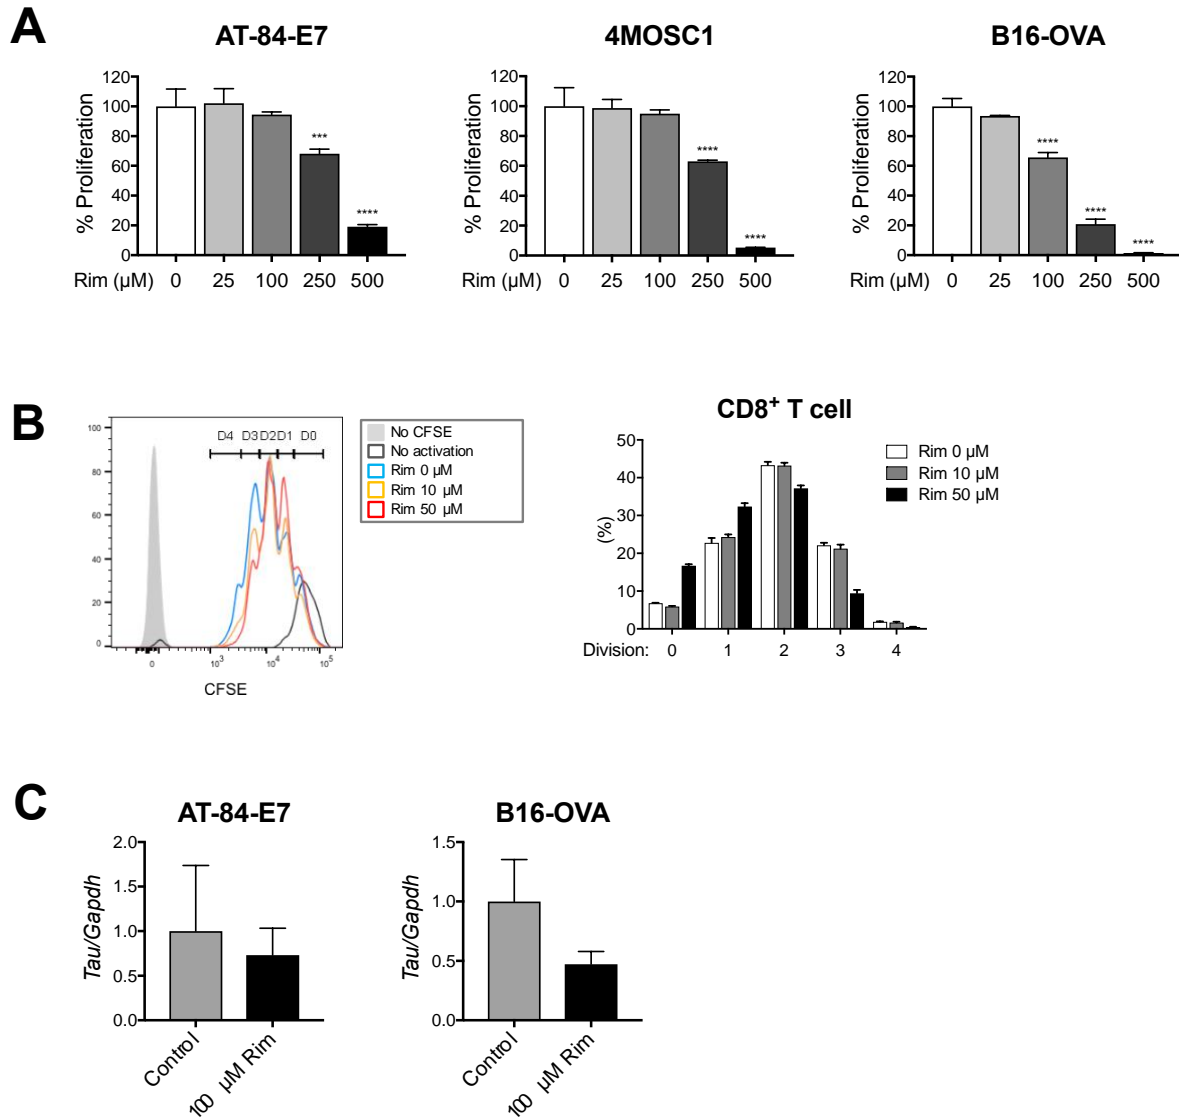

**Supplementary Figure 5:** Rimantadine inhibits cell proliferation in head and neck cancer cell lines and downregulates microtubule-associated molecules. **A)** Cell proliferation (MTT) was analyzed 48 hours following treatment with rimantadine. **B)** T-cell proliferation (CFSE) was analyzed 72 hours following treatment with rimantadine. **C)** *Tau* mRNA expression was analyzed 24 hours following treatment with rimantadine. Data are shown as mean  $\pm$  S.E.M. Statistics were done using an unpaired *t*-test or one-way ANOVA.

**Supplementary Table 1: Clinical data of HNSCC Johns Hopkins University cohort**

|                               | <b>Normal<br/>(n = 25)</b> | <b>E245 high<br/>(n = 25)</b> | <b>E67 high<br/>(n = 10)</b> |
|-------------------------------|----------------------------|-------------------------------|------------------------------|
| <b>Age</b>                    |                            |                               |                              |
| Median                        | 27                         | 56                            | 51                           |
| Minimum                       | 18                         | 44                            | 37                           |
| Maximum                       | 51                         | 75                            | 65                           |
| <b>Sex</b>                    |                            |                               |                              |
| Male                          | 10 (40%)                   | 22 (88%)                      | 9 (90%)                      |
| Female                        | 15 (60%)                   | 3 (12%)                       | 1 (10%)                      |
| <b>Race</b>                   |                            |                               |                              |
| White                         | 14 (56%)                   | 24 (96%)                      | 10 (100%)                    |
| Black                         | 9 (36%)                    | 0 (0%)                        | 0 (0%)                       |
| Asian                         | 0 (0%)                     | 1 (4%)                        | 0 (0%)                       |
| Other                         | 2 (8%)                     | 0 (0%)                        | 0 (0%)                       |
| <b>Smoking</b>                |                            |                               |                              |
| Never                         | 19 (76%)                   | 11 (44%)                      | 2 (20%)                      |
| Current                       | 4 (16%)                    | 7 (28%)                       | 2 (20%)                      |
| Former                        | 2 (8%)                     | 7 (28%)                       | 6 (60%)                      |
| <b>Integration</b>            |                            |                               |                              |
| Yes                           |                            | 2 (8%)                        | 10 (100%)                    |
| <b>Subtype</b>                |                            |                               |                              |
| IMS                           |                            | 13 (52%)                      | 3 (30%)                      |
| BA                            |                            | 7 (28%)                       | 3 (30%)                      |
| CL                            |                            | 5 (20%)                       | 4 (40%)                      |
| <b>T stage</b>                |                            |                               |                              |
| T0                            |                            | 2 (8%)                        | 0 (0%)                       |
| T1                            |                            | 9 (36%)                       | 4 (40%)                      |
| T2                            |                            | 11 (44%)                      | 4 (40%)                      |
| T3                            |                            | 3 (12%)                       | 1 (10%)                      |
| T4                            |                            | 0 (0%)                        | 1 (10%)                      |
| <b>N stage</b>                |                            |                               |                              |
| 0                             |                            | 0 (0%)                        | 1 (10%)                      |
| 1                             |                            | 19 (76%)                      | 8 (80%)                      |
| 2                             |                            | 4 (16%)                       | 1 (10%)                      |
| 3                             |                            | 2 (8%)                        | 0 (0%)                       |
| Advanced N stage<br>(2 and 3) |                            | 6 (24%)                       | 1 (10%)                      |
| <b>M stage</b>                |                            |                               |                              |
| 0                             |                            | 25 (100%)                     | 10 (100%)                    |
| <b>Stage</b>                  |                            |                               |                              |
| 1                             |                            | 18 (72%)                      | 7 (70%)                      |
| 2                             |                            | 5 (20%)                       | 2 (20%)                      |
| 3                             |                            | 2 (8%)                        | 1 (10%)                      |
| 4                             |                            | 0 (0%)                        | 0 (0%)                       |
| <b>Overall survival</b>       |                            |                               |                              |
| Alive                         |                            | 20 (80%)                      | 7 (70%)                      |
| Dead                          |                            | 5 (20%)                       | 3 (30%)                      |
| <b>Recurrence</b>             |                            |                               |                              |
| Yes                           |                            | 2 (8%)                        | 0 (0%)                       |

**Supplementary Table 2: HPV status and HLA mRNA expression level**

|                       | <b>Normal<br/>(n = 25)</b> | <b>E245 high<br/>(n = 26)</b> | <b>E67 high<br/>(n = 10)</b> | <b><math>\chi^2</math></b> | <b>P-value</b> |
|-----------------------|----------------------------|-------------------------------|------------------------------|----------------------------|----------------|
| <b>HLA-A</b>          |                            |                               |                              |                            |                |
| Low (<10000)          | 3 (12%) ▽                  | 12 (46.2%) ▲                  | 1 (10%)                      | 19.090                     | 0.0008 ***     |
| Average (10000-20000) | 20 (80%) ▲                 | 8 (30.8%) ▽                   | 4 (40%)                      |                            |                |
| High (20000<)         | 2 (8%) ▽                   | 6 (23.1%)                     | 5 (50%) ▲                    |                            |                |
| <b>HLA-B</b>          |                            |                               |                              |                            |                |
| Low (<15000)          | 2 (8%) ▽                   | 12 (46.2%) ▲                  | 0 (0%)                       | 20.235                     | 0.0004 ***     |
| Average (15000-30000) | 16 (64%) ▲                 | 6 (23.1%) ▽                   | 3 (30%)                      |                            |                |
| High (30000<)         | 7 (28%)                    | 8 (30.8%)                     | 7 (70%) ▲                    |                            |                |
| <b>HLA-C</b>          |                            |                               |                              |                            |                |
| Low (<6000)           | 5 (20%)                    | 11 (42.3%) ▲                  | 0 (0%) ▽                     | 16.385                     | 0.0025 **      |
| Average (6000-13000)  | 15 (60%) ▲                 | 5 (19.2%) ▽                   | 3 (30%)                      |                            |                |
| High (13000<)         | 5 (20%) ▽                  | 10 (38.5%)                    | 7 (70%) ▲                    |                            |                |
| <b>HLA-E</b>          |                            |                               |                              |                            |                |
| Low (<8000)           | 1 (4%) ▽                   | 15 (57.7%) ▲                  | 3 (30%)                      | 17.869                     | 0.0013 **      |
| Average (8000-15000)  | 16 (64%)                   | 9 (34.6%) ▽                   | 5 (50%)                      |                            |                |
| High (15000<)         | 8 (32%) ▲                  | 2 (7.7%) ▽                    | 2 (20%)                      |                            |                |
| <b>HLA-F</b>          |                            |                               |                              |                            |                |
| Low (<2000)           | 9 (36%)                    | 14 (53.8%)                    | 3 (30%)                      | 9.353                      | 0.0529         |
| Average (2000-4000)   | 15 (60%)                   | 11 (42.3%)                    | 4 (40%)                      |                            |                |
| High (4000<)          | 1 (4%)                     | 1 (3.8%)                      | 3 (30%) ▲                    |                            |                |

Patients were assigned to 3 groups based on the mRNA expression level (low, average, and high). Table shows the results of Chi-square test ( $\chi^2$  and  $p$ -value) and residual analysis (▲: significantly high, ▽: significantly low,  $P < 0.05$ ).
